# Supplementary material for: Prediction of Remaining Useful Life of Packing Sets in a Plunger-Type High-Pressure Compressor Based on the PCA/SVD Analysis and NN Model
Source: Hindawi journal article supplement (doi:10.1155/2023/1091276), 2023-01-13
Supplement: f1 [file 1091276.f1.zip]

Archive with 3 entries (3 files):
- Supplementary Table1.docx
- Supplementary Table2.docx
- Supplementary Table3.docx
