# Supplementary material for: Prediction of Remaining Useful Life of Packing Sets in a Plunger-Type High-Pressure Compressor Based on the PCA/SVD Analysis and NN Model
Source: Hindawi journal article supplement (doi:10.1155/2023/1091276), 2023-01-13
Supplement: f1 [file 1091276.f1.zip › Supplementary Table2.docx]

Supplementary Table 2 NN output is used as the target HI curve and fitted by using Equation (10) or (11) (yellow line and red line in Fig. 9), RUL prediction is done accordingly with Equation (10) or (11) when NN has two hidden layers and the number of hidden nodes are 10 and 5, respectively.

| Value of predicted HI to predict RUL | Set1 | | Set2 | | Set3 | | Set4 | | Set5 | | Set6 | | Set7 | | Set8 | | Set9 | | Set10 | | Set11 | | Set12 | | Set13 | |
| --- | --- | --- | --- | --- | --- | --- | --- | --- | --- | --- | --- | --- | --- | --- | --- | --- | --- | --- | --- | --- | --- | --- | --- | --- | --- | --- |
| Differences between predicted RUL using Equation (10) or (11) and actual RUL | | | | | | | | | | | | | | | | | | | | | | | | | |
| (11) | (10) | (11) | (10) | (11) | (10) | (11) | (10) | (11) | (10) | (11) | (10) | (11) | (10) | (11) | (10) | (11) | (10) | (11) | (10) | (11) | (10) | (11) | (10) | (11) | (10) |
| 10 | -2 | -1 | 2 | -1 | -12 | -3 | 3 | 0 | 18 | 6 | 0 | -3 | -7 | 0 | 8 | 2 | 3 | 0 | -3 | 2 | 7 | 6 | -15 | 0 | 0 | -1 |
| 15 | -3 | -2 | 12 | 6 | -14 | -3 | 14 | 9 | 18 | 7 | 0 | -3 | -6 | -1 | -1 | 0 | 2 | -4 | -2 | 15 | 7 | 7 | 6 | 5 | 0 | -1 |
| 20 | -4 | -19 | 15 | 12 | -15 | -2 | -87 | 9 | 18 | 7 | 0 | -3 | -5 | -1 | 5 | -5 | 2 | -5 | -1 | 20 | 7 | 7 | 6 | 4 | 0 | 4 |
| 25 | -7 | -21 | 16 | 17 | -15 | -2 | -89 | 22 | 18 | 6 | 0 | -4 | -4 | -2 | 13 | -10 | 0 | -5 | 0 | 31 | 7 | 8 | 6 | -141 | -16 | 4 |
| 30 | -11 | -20 | 13 | 19 | -14 | -2 | -90 | 22 | 15 | -10 | -5 | -6 | -7 | -14 | 18 | -27 | -2 | -1 | 1 | 38 | -9 | 9 | 29 | -141 | -13 | 10 |
| 35 | -11 | -19 | -147 | 11 | -13 | 2 | -91 | 42 | 15 | -30 | -5 | -42 | -12 | -13 | 20 | -48 | -9 | 5 | 3 | 50 | -9 | 10 | 29 | -141 | -8 | 10 |
| 40 | -11 | -18 | -146 | -48 | -12 | 6 | -92 | 42 | 15 | -30 | -23 | -44 | -11 | -12 | 77 | -65 | -8 | 15 | 6 | 56 | -9 | 10 | -51 | -141 | -8 | 15 |
| 45 | -10 | -18 | -146 | -64 | -11 | 11 | -92 | 74 | 14 | -32 | -19 | -46 | -12 | -11 | 136 | -60 | -1 | 28 | 9 | 64 | -8 | 10 | -89 | -141 | -3 | 15 |
| 50 | -10 | -16 | -145 | -63 | -13 | 17 | -93 | 74 | 15 | -35 | -12 | -46 | -18 | -10 | 196 | -54 | 9 | 28 | 13 | 66 | -8 | 9 | -88 | -141 | 4 | -35 |
| 55 | -9 | -13 | -144 | -162 | -18 | 34 | -93 | 129 | 17 | -36 | -8 | -47 | -39 | -9 | 67 | -45 | 23 | 48 | 16 | 65 | -7 | 4 | -84 | -141 | 4 | -36 |
| 60 | -8 | -10 | -143 | -167 | -18 | 45 | -92 | 129 | 24 | -38 | -4 | -48 | -41 | -7 | -30 | -34 | 39 | 80 | 20 | -24 | -5 | 1 | -81 | -141 | 12 | -35 |
