# Supplementary material for: Prediction of Remaining Useful Life of Packing Sets in a Plunger-Type High-Pressure Compressor Based on the PCA/SVD Analysis and NN Model
Source: Hindawi journal article supplement (doi:10.1155/2023/1091276), 2023-01-13
Supplement: f1 [file 1091276.f1.zip › Supplementary Table3.docx]

Supplementary Table 3 NN output is real HI which didn’t fit by using Equation (10) or (11) (blue line in Fig. 9), RUL prediction is done with Equation (10) or (11) when NN has two hidden layers and the number of hidden nodes are 10 and 5, respectively.

| Value of predicted HI to predict RUL | Set1 | | Set2 | | Set3 | | Set4 | | Set5 | | Set6 | | Set7 | | Set8 | | Set9 | | Set10 | | Set11 | | Set12 | | Set13 | |
| --- | --- | --- | --- | --- | --- | --- | --- | --- | --- | --- | --- | --- | --- | --- | --- | --- | --- | --- | --- | --- | --- | --- | --- | --- | --- | --- |
| Differences between predicted RUL using Equation (10) or (11) and actual RUL | | | | | | | | | | | | | | | | | | | | | | | | | |
| (11) | (10) | (11) | (10) | (11) | (10) | (11) | (10) | (11) | (10) | (11) | (10) | (11) | (10) | (11) | (10) | (11) | (10) | (11) | (10) | (11) | (10) | (11) | (10) | (11) | (10) |
| 10 | -10 | -4 | -3 | -1 | 1 | -14 | 2 | 2 | 12 | 3 | 9 | 0 | 3 | -10 | 15 | 0 | 9 | 12 | 1 | -13 | 13 | 13 | -7 | -8 | -9 | 12 |
| 15 | -13 | -5 | 2 | 2 | 2 | -14 | 2 | 15 | 12 | 2 | 9 | -1 | -9 | -9 | 15 | -1 | 10 | 12 | -21 | -11 | 13 | 13 | -88 | -6 | -8 | 12 |
| 20 | -14 | -6 | 2 | 4 | 1 | -13 | 2 | 23 | 12 | 1 | 8 | -2 | -9 | -10 | 15 | -12 | 10 | 12 | -14 | -9 | 13 | 13 | -95 | -6 | -6 | 12 |
| 25 | -15 | -7 | 7 | 3 | -17 | -12 | -5 | 31 | 12 | 1 | -5 | -2 | -11 | -12 | 16 | -19 | 9 | 11 | -8 | -6 | 13 | 13 | -104 | -5 | -4 | 12 |
| 30 | -15 | -8 | 12 | -4 | -17 | -12 | -3 | 40 | 12 | 0 | -5 | -3 | -14 | -20 | 18 | -56 | 9 | 6 | -3 | -3 | 13 | -37 | -106 | -5 | -2 | -25 |
| 35 | -15 | -13 | 18 | -26 | -16 | -11 | -1 | 49 | 12 | -1 | -5 | -40 | -28 | -22 | 19 | -74 | 8 | 2 | 3 | -1 | 13 | -32 | -106 | -5 | 1 | -23 |
| 40 | -14 | -20 | 23 | -143 | -16 | -10 | 2 | 58 | 13 | -3 | -5 | -41 | -27 | -27 | 19 | -78 | -17 | -1 | 10 | 1 | 13 | -24 | -105 | -44 | 1 | -20 |
| 45 | -13 | -20 | 29 | -140 | -15 | -9 | 7 | 65 | 13 | -4 | -5 | -42 | -26 | -46 | 23 | -75 | -21 | -3 | 14 | 4 | -6 | -12 | -103 | -33 | 6 | -20 |
| 50 | -12 | -19 | 34 | -137 | -14 | -4 | 14 | 73 | 14 | -6 | -2 | -42 | -24 | -46 | 33 | -70 | -16 | -9 | 22 | 6 | -4 | 5 | -101 | -24 | 11 | -17 |
| 55 | -10 | -18 | 39 | -133 | -13 | -1 | 19 | 54 | 17 | -7 | 3 | -44 | -22 | -47 | 39 | -64 | -11 | -22 | 35 | 8 | -3 | 5 | -99 | -19 | 11 | -11 |
| 60 | -8 | -17 | 46 | -127 | -10 | 4 | 26 | -46 | 21 | -7 | 11 | -44 | -22 | -47 | 46 | -59 | 14 | -39 | 44 | 9 | 1 | 31 | -96 | -14 | 17 | -11 |
